# Supplementary material for: A green strategy for recycling cathode materials from spent lithium-ion batteries using glutathione
Source: Royal Society of Chemistry journal article supplement (doi:10.1039/d3gc00540b), 2023-01-01
Supplement: d3gc00540b1.pdf [file d3gc00540b1.pdf]

## *Supporting Information*

### **Green strategy for recycling cathode materials from spent lithium-ion batteries using glutathione**

Kunhong Gu<sup>1</sup>, Xingyuan Gu<sup>2</sup>, Yongwei Wang<sup>1</sup>, Wenqing Qin<sup>1</sup>, Junwei Han<sup>1\*</sup>

*1. School of Minerals Processing & Bioengineering, Central South University,*

*Changsha 410083, China*

*2. School of Traditional Chinese Medicine, Beijing University of Chinese Medicine,*

*Beijing 100029, China*

*Corresponding author: Junwei Han, [hanjunwei@csu.edu.cn](mailto:hanjunwei@csu.edu.cn)*

**The following are included in the supplementary information below:**

- **Fig. S1** The preparation process for raw materials
- **Fig. S2** XRD and SEM diagrams of raw materials.
- **Fig. S3** Flow chart of the recycling process
- **Fig. S4** Response surface diagram of the influence of  $\text{H}_2\text{SO}_4$  concentration and GSH dosage( $n(\text{A})/n(\text{T})$ ) on metal leaching efficiencies: (a)Li, (b)Ni, (c)Co, (d)Mn.
- **Fig. S5** Response surface diagram of the influence of  $\text{H}_2\text{SO}_4$  concentration and leaching temperature on metal leaching efficiencies: (a)Li, (b)Ni, (c)Co, (d)Mn.
- **Fig. S6** Response surface diagram of the influence of GSH dosage( $n(\text{A})/n(\text{T})$ ) and leaching temperature on metal leaching efficiencies: (a)Li, (b)Ni, (c)Co, (d)Mn.
- **Fig. S7** Optimal leaching conditions and prediction of leaching efficiencies
- **Fig. S8** Fitting results of surface chemical reaction control model for metal leaching efficiencies in  $\text{H}_2\text{SO}_4$ +GSH leaching system:(a) Li, (b)Ni, (c)Co, (d)Mn
- **Fig. S9** Fitting results of internal diffusion control model for metal leaching efficiencies in  $\text{H}_2\text{SO}_4$ +GSH leaching system:(a) Li, (b)Ni, (c)Co, (d)Mn
- **Fig. S10** Fitting results of Avrami equation for metal leaching efficiencies in  $\text{H}_2\text{SO}_4$ +GSH leaching system:(a) Li, (b)Ni, (c)Co, (d)Mn
- **Fig. S11** Fitting results of surface chemical reaction control model for metal leaching efficiencies in  $\text{H}_2\text{SO}_4$ + $\text{H}_2\text{O}_2$  leaching system:(a) Li, (b)Ni, (c)Co, (d)Mn
- **Fig. S12** Fitting results of internal diffusion control model for metal leaching efficiencies in  $\text{H}_2\text{SO}_4$ + $\text{H}_2\text{O}_2$  leaching system:(a) Li, (b)Ni, (c)Co, (d)Mn
- **Fig. S13** Fitting results of Avrami equation for metal leaching efficiencies in  $\text{H}_2\text{SO}_4$ + $\text{H}_2\text{O}_2$  leaching system:(a) Li, (b)Ni, (c)Co, (d)Mn
- **Fig. S14** Properties of the recovered lithium carbonate: (a) XRD of the recovered lithium carbonate, (b) SEM of the recovered lithium carbonate and (c) EDS of the recovered lithium carbonate
- **Table S1** Main chemical composition of the cathode materials
- **Table S2** Content of GSH and GSSG in leaching solution

- **Table S3** Chemical composition of leachate under the optimal condition
- **Table S4** Content of GSH and GSSG in solution
- **Table S5** The results of regression analysis and variance analysis
- **Table S6** Fitting electrochemical parameters obtained from EIS
- **Table S7** The composition of the remaining solution after metal recovery
- **Table S8** The materials and energy consumption to dispose of 1 kg spent NCM cathode materials
- **Table S9** The comparison of different methods for recycling of spent cathode material
- **References**

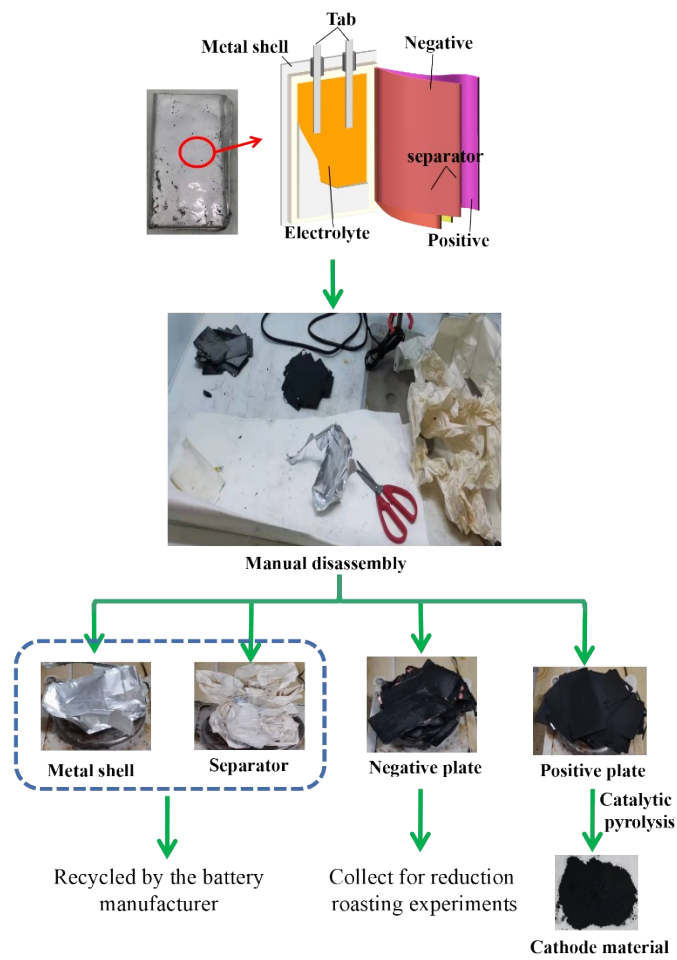

**Fig. S1** The preparation process for raw materials

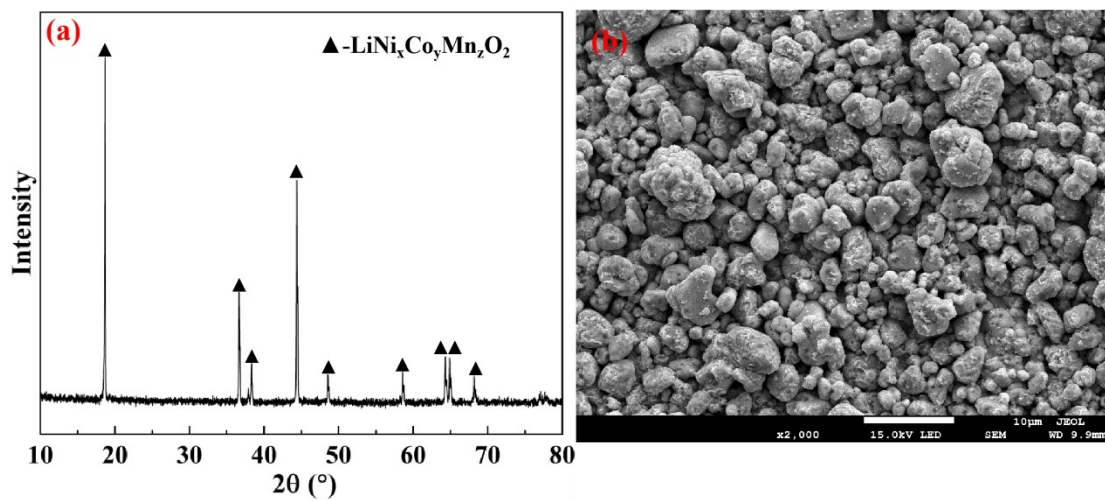

Fig. S2 XRD and SEM diagrams of raw materials.

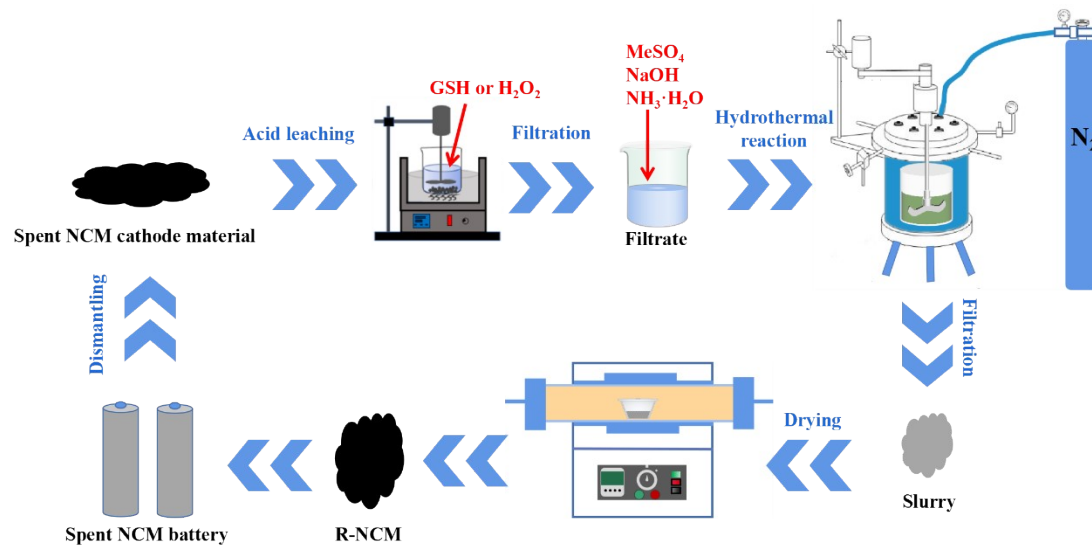

Fig. S3 Flow chart of the recycling process

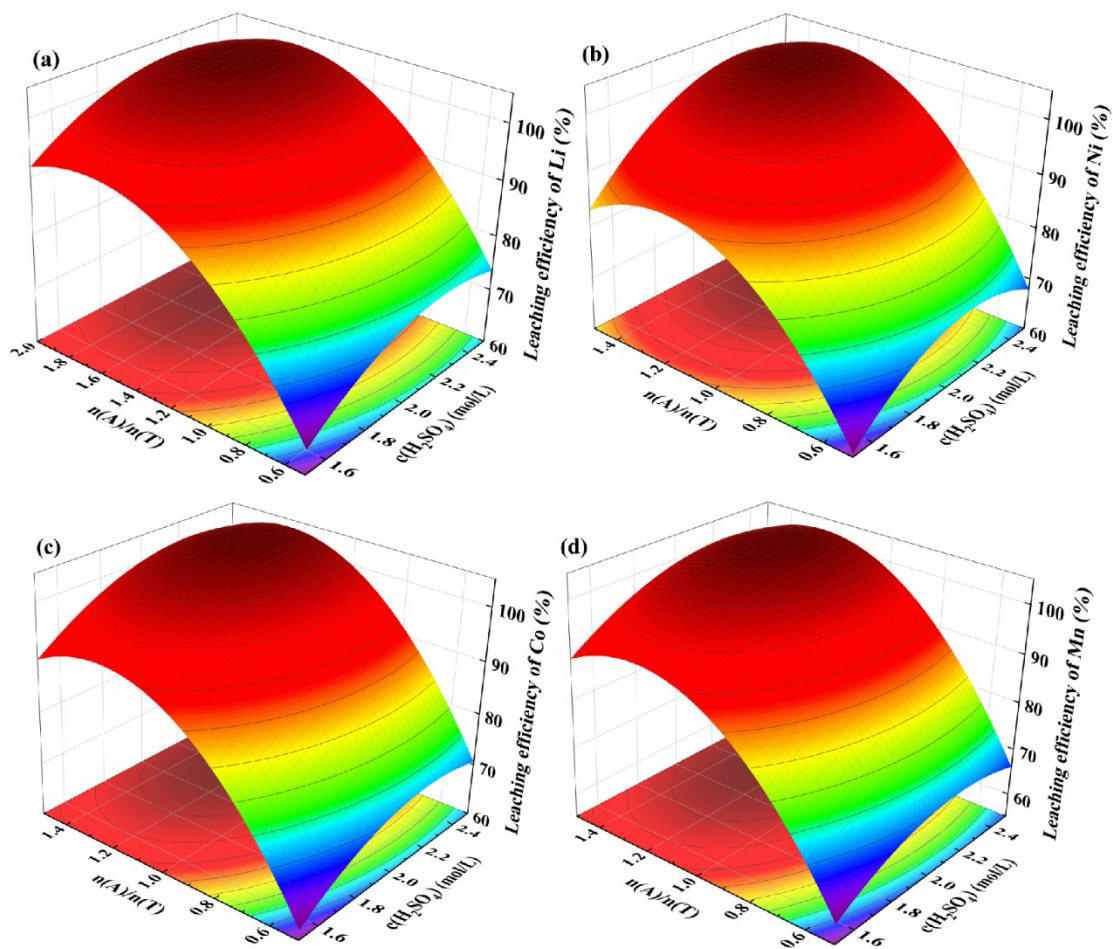

**Fig. S4** Response surface diagram of the influence of  $H_2SO_4$  concentration and GSH

dosage( $n(A)/n(T)$ ) on metal leaching efficiencies: (a)Li, (b)Ni, (c)Co, (d)Mn.

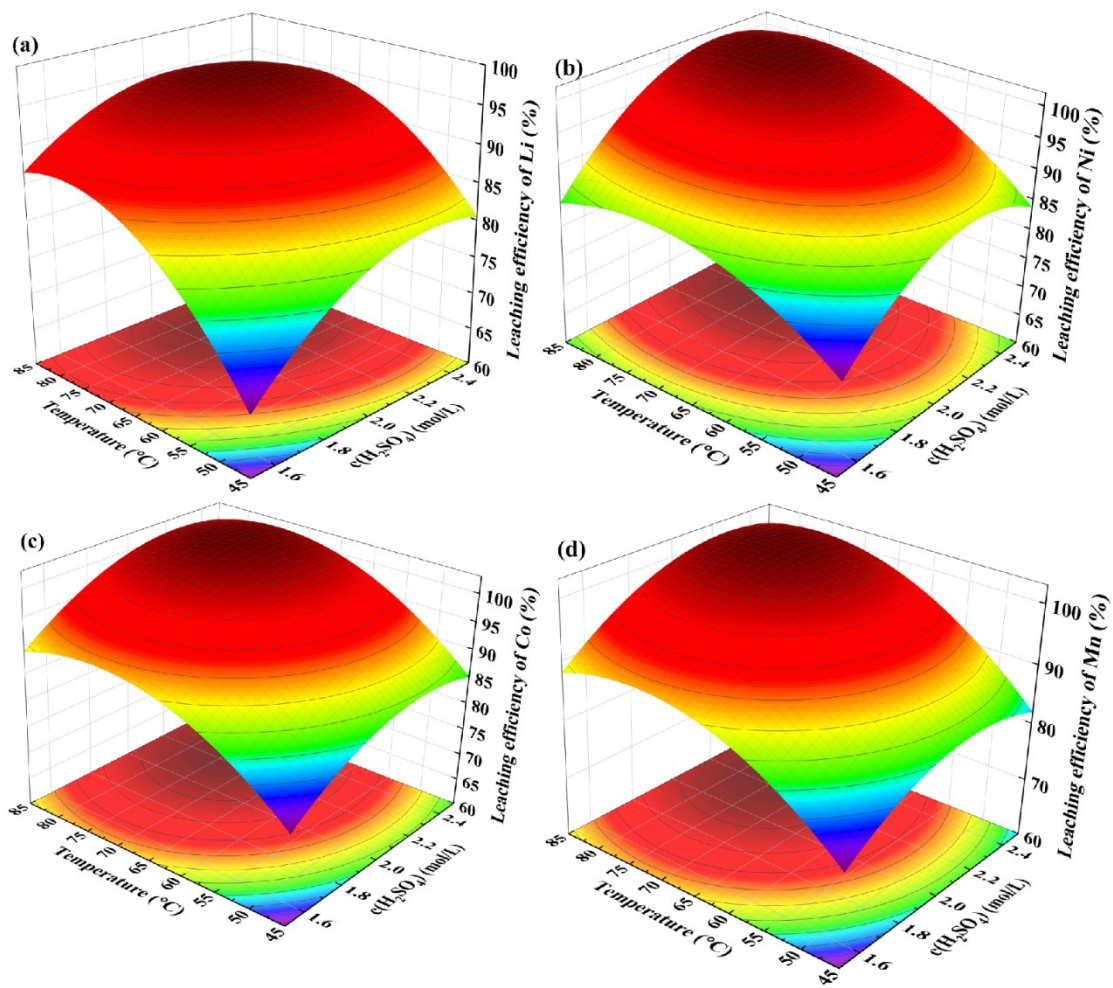

**Fig. S5** Response surface diagram of the influence of H<sub>2</sub>SO<sub>4</sub> concentration and leaching temperature on metal leaching efficiencies: (a)Li, (b)Ni, (c)Co, (d)Mn.



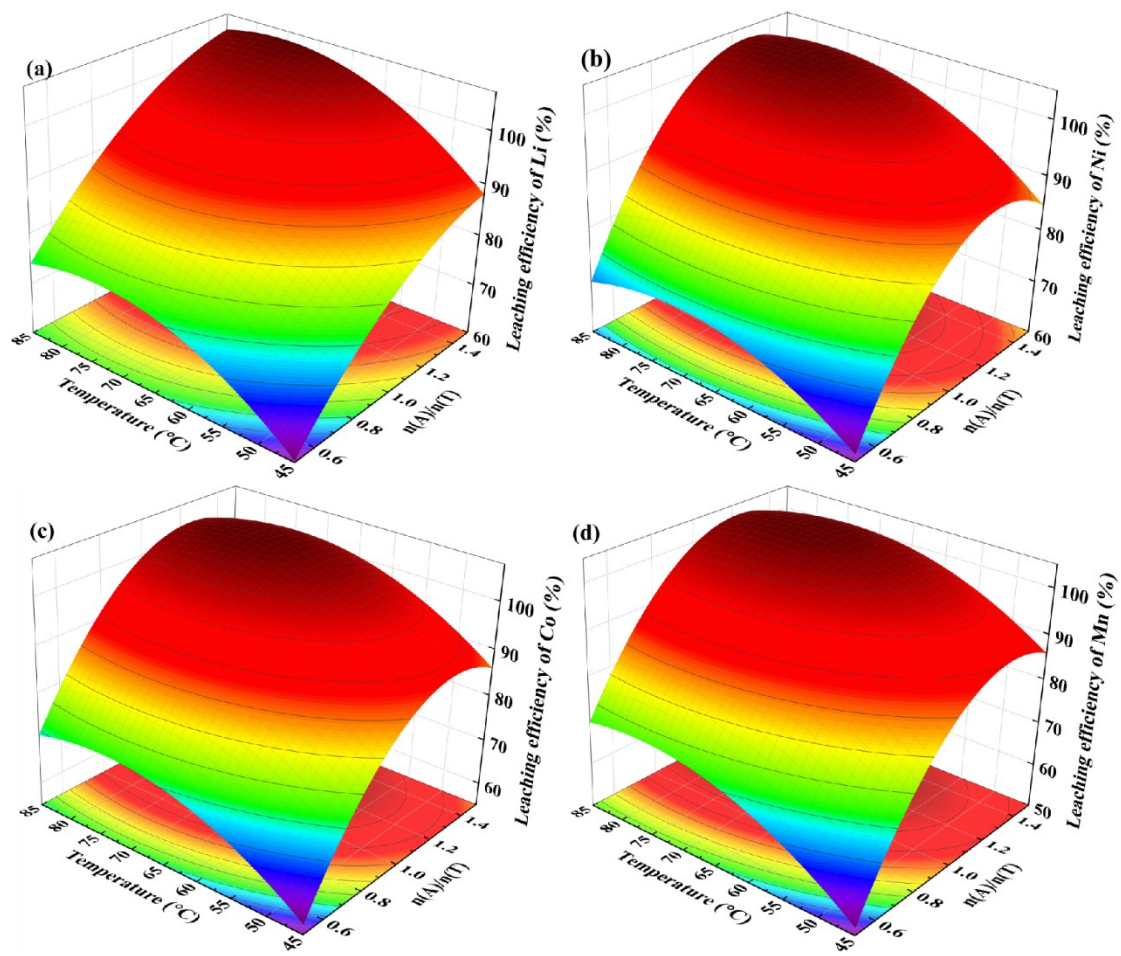

**Fig. S6** Response surface diagram of the influence of GSH dosage( $n(A)/n(T)$ ) and leaching temperature on metal leaching efficiencies: (a)Li, (b)Ni, (c)Co, (d)Mn.

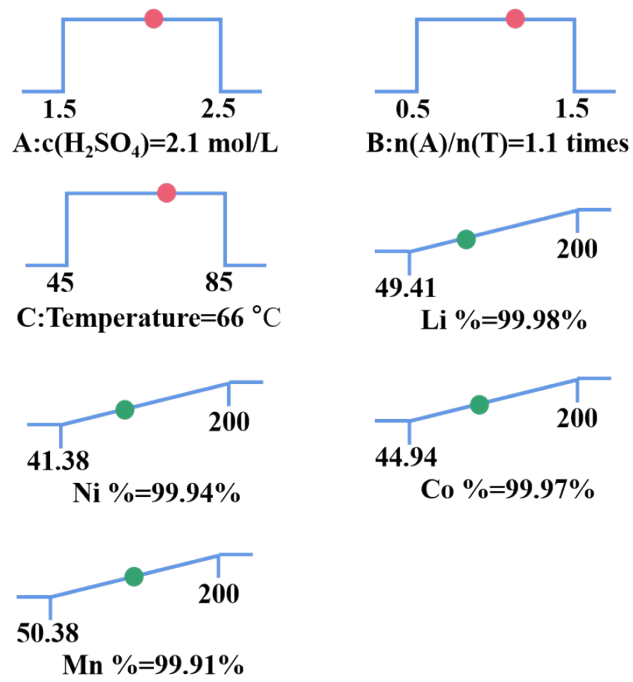

**Fig. S7** Optimal leaching conditions and prediction of leaching efficiencies

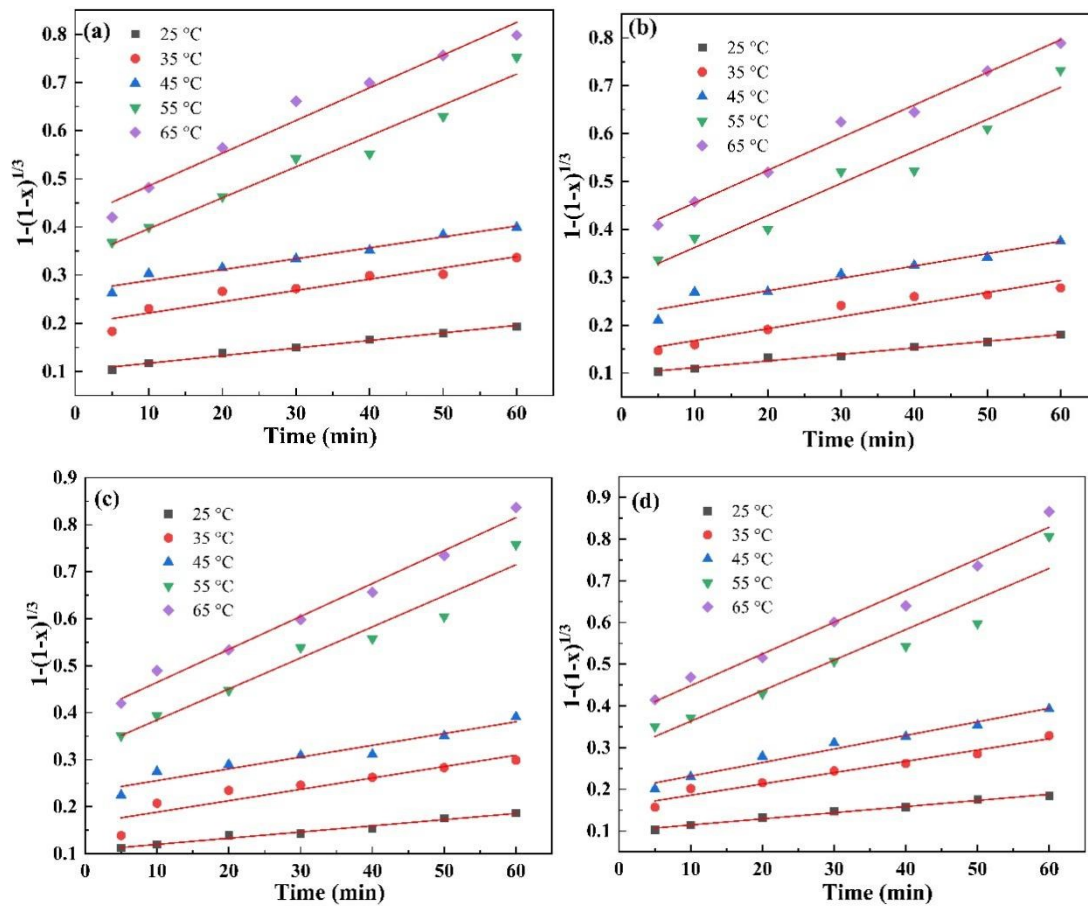

**Fig. S8** Fitting results of surface chemical reaction control model for metal leaching efficiencies in

$\text{H}_2\text{SO}_4$ +GSH leaching system:(a) Li, (b)Ni, (c)Co, (d)Mn

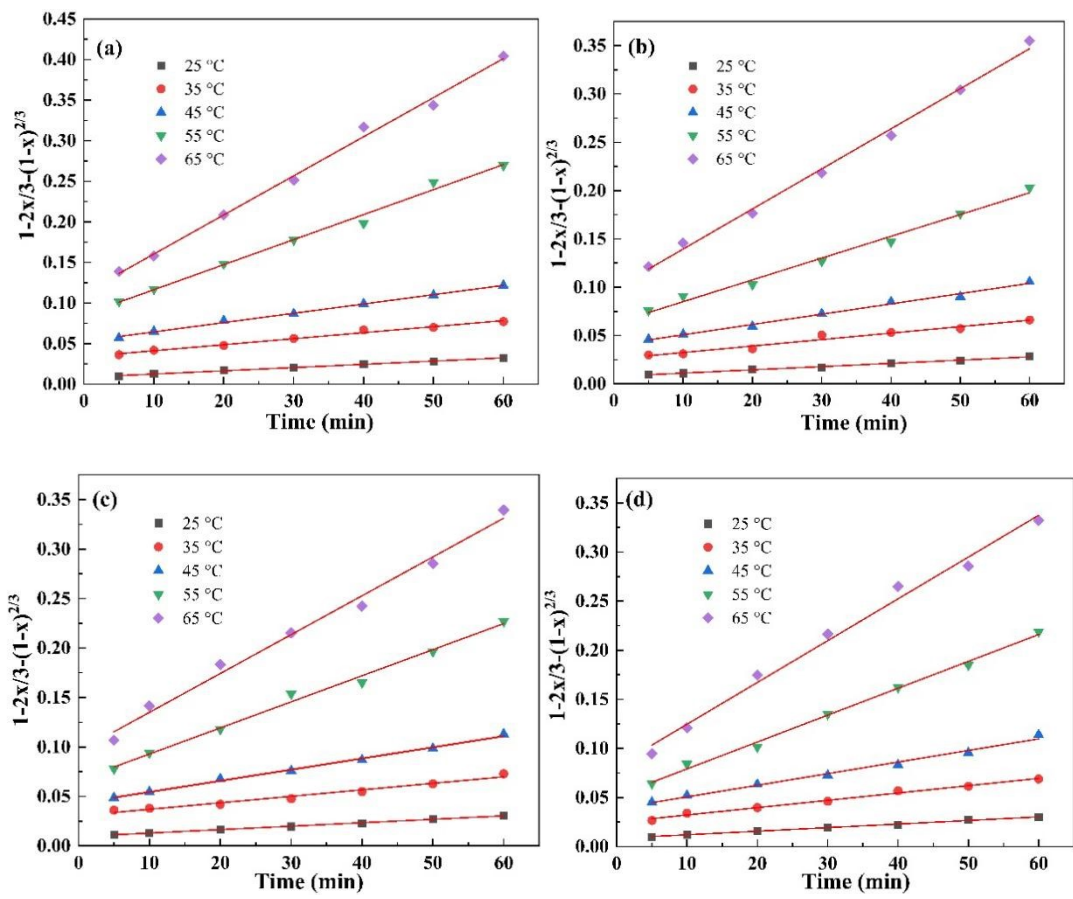

**Fig. S9** Fitting results of internal diffusion control model for metal leaching efficiencies in

$H_2SO_4+GSH$  leaching system:(a) Li, (b)Ni, (c)Co, (d)Mn

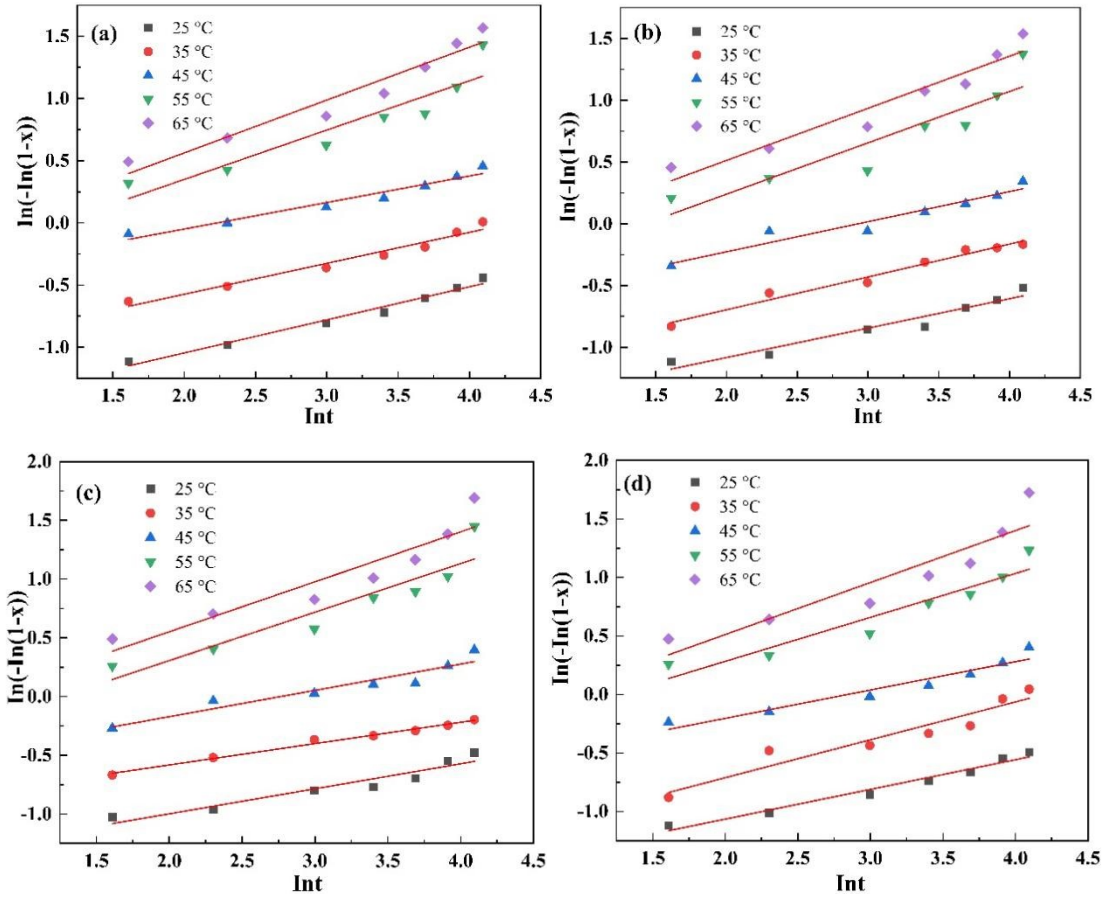

**Fig. S10** Fitting results of Avrami equation for metal leaching efficiencies in  $\text{H}_2\text{SO}_4$ +GSH

leaching system:(a) Li, (b)Ni, (c)Co, (d)Mn

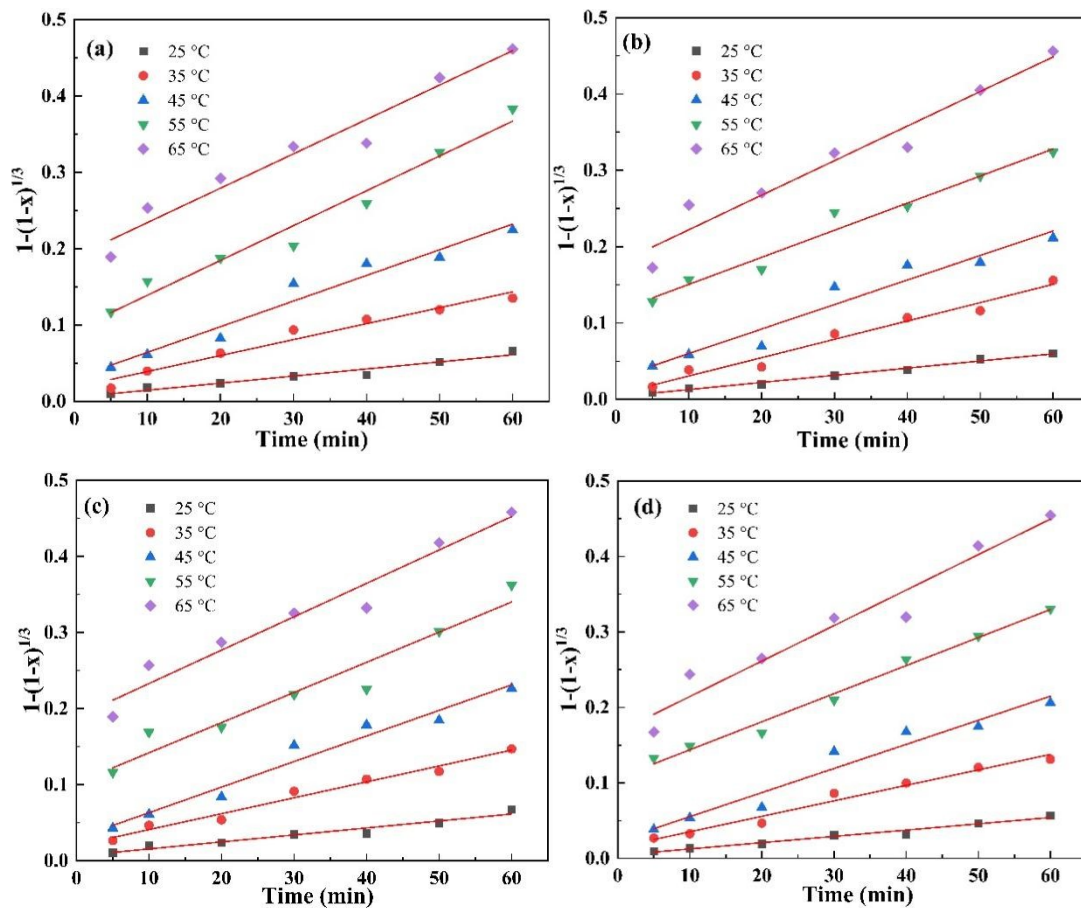

**Fig. S11** Fitting results of surface chemical reaction control model for metal leaching efficiencies

in  $\text{H}_2\text{SO}_4+\text{H}_2\text{O}_2$  leaching system:(a) Li, (b)Ni, (c)Co, (d)Mn

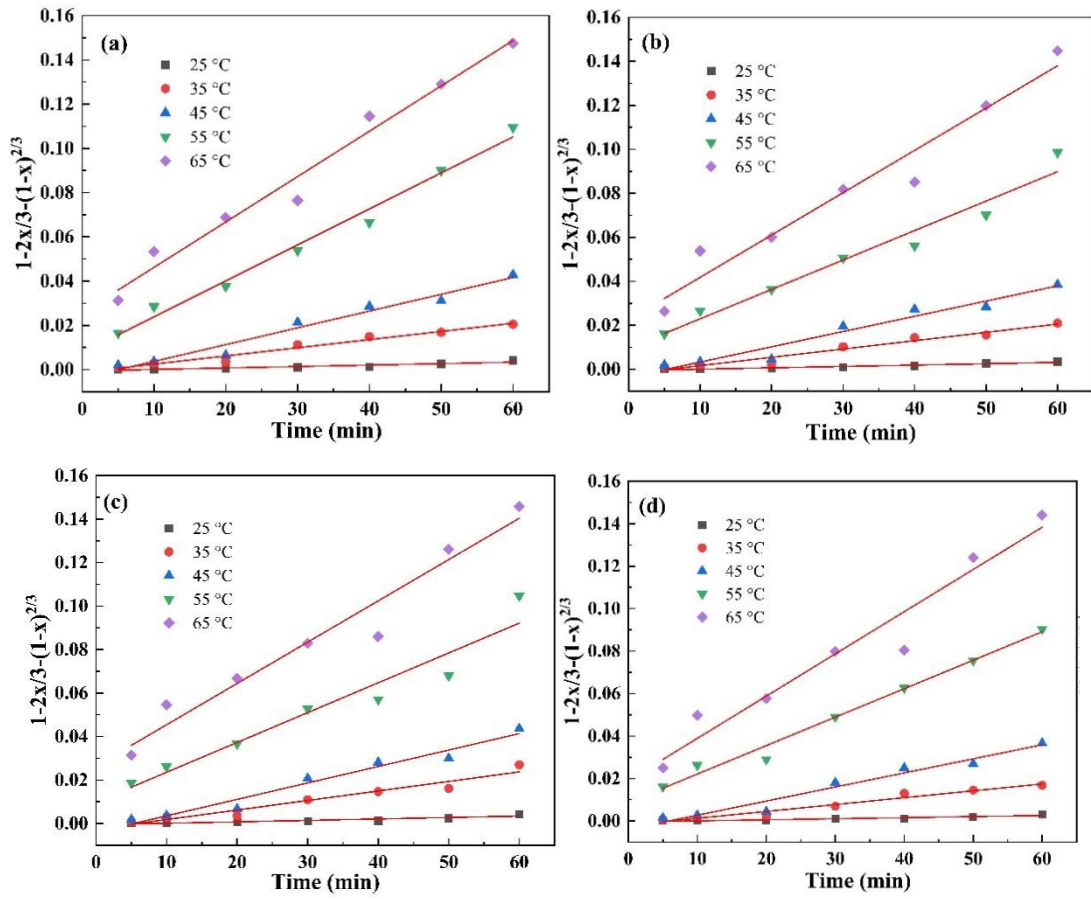

**Fig. S12** Fitting results of internal diffusion control model for metal leaching efficiencies in

$\text{H}_2\text{SO}_4 + \text{H}_2\text{O}_2$  leaching system: (a) Li, (b) Ni, (c) Co, (d) Mn

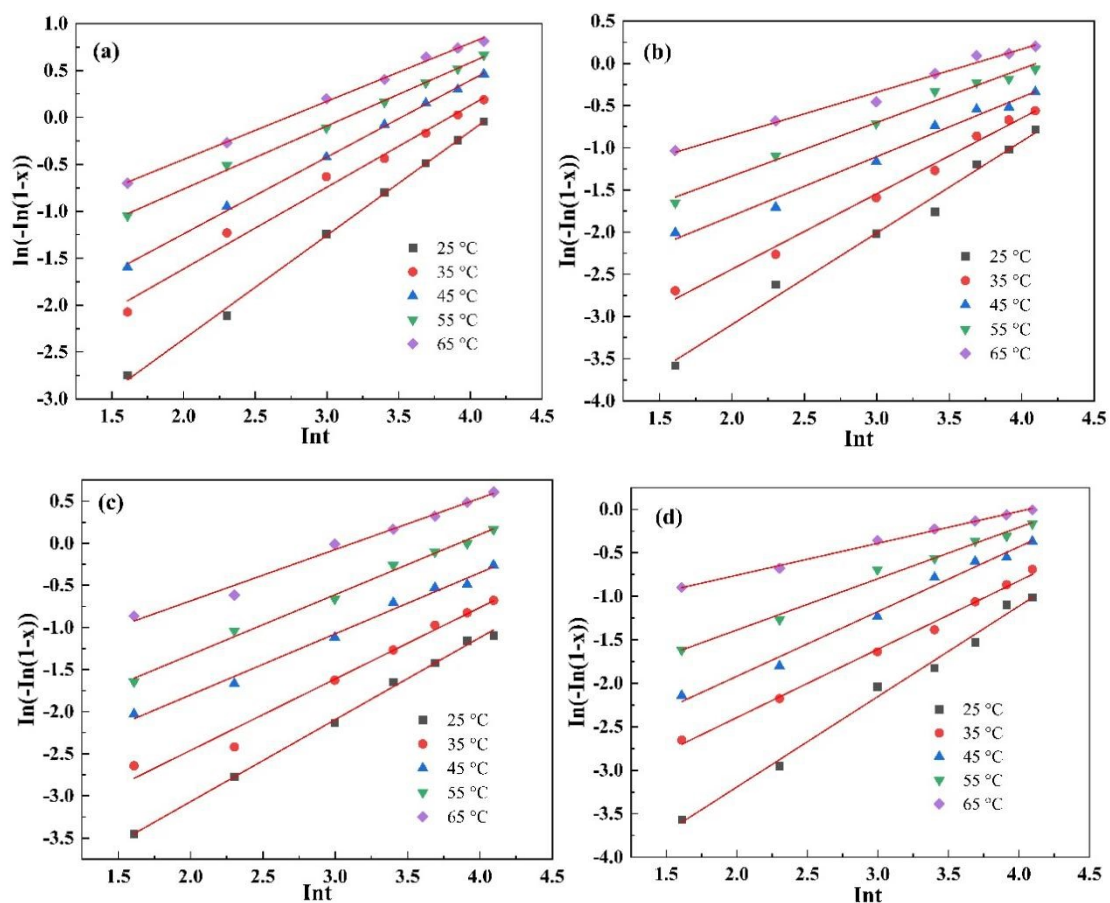

**Fig. S13** Fitting results of Avrami equation for metal leaching efficiencies in  $\text{H}_2\text{SO}_4+\text{H}_2\text{O}_2$

leaching system:(a) Li, (b)Ni, (c)Co, (d)Mn



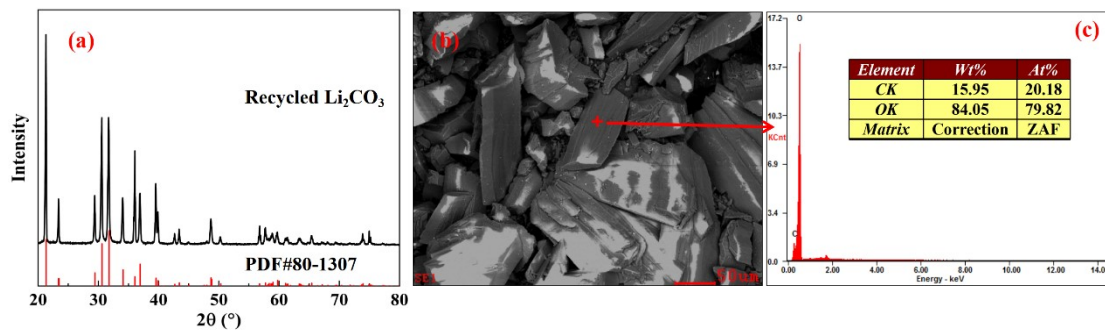

**Fig. S14** Properties of the recovered lithium carbonate: (a) XRD of the recovered lithium carbonate, (b) SEM of the recovered lithium carbonate and (c) EDS of the recovered lithium carbonate

**Table S1** Main chemical composition of the cathode materials

| Composition | Li   | Ni    | Co    | Mn    | Al   | Cu   |
|-------------|------|-------|-------|-------|------|------|
| Wt.%        | 6.97 | 30.74 | 12.69 | 18.71 | 0.64 | 0.02 |

**Table S2** Content of GSH and GSSG in leaching solution

| Composition | GSSG       | GSH        |
|-------------|------------|------------|
|             | 0.52 mol/L | 0.52 mol/L |

**Table S3** Chemical composition of leachate under the optimal condition

| Composition | Li       | Ni        | Co       | Mn      | GSSG       | GSH |
|-------------|----------|-----------|----------|---------|------------|-----|
|             | 3.49 g/L | 15.34 g/L | 6.31 g/L | 9.3 g/L | 0.26 mol/L | -   |

**Table S4** Content of GSH and GSSG in solution

| Composition | GSSG       | GSH |
|-------------|------------|-----|
|             | 0.85 mol/L | -   |

**Table S5** The results of regression analysis and variance analysis

| Response value | Error source   | P value | significance    |
|----------------|----------------|---------|-----------------|
| Li             | Leaching model | 0.0011  | Significant     |
|                | loss of fit    | 0.1213  | Not significant |
| Ni             | Leaching model | 0.0036  | Significant     |
|                | loss of fit    | 0.0937  | Not significant |
| Co             | Leaching model | 0.0026  | Significant     |
|                | loss of fit    | 0.0884  | Not significant |
| Mn             | Leaching model | 0.0031  | Significant     |
|                | loss of fit    | 0.1159  | Not significant |

**Table S6** Fitting electrochemical parameters obtained from EIS

| Materials | $R_s$ ( $\Omega$ ) | $R_{SEI}$ ( $\Omega$ ) | $R_{ct}$ ( $\Omega$ ) |
|-----------|--------------------|------------------------|-----------------------|
| G-NCM     | 3.75               | 15.77                  | 58.14                 |
| H-NCM     | 3.92               | 23.43                  | 80.92                 |

**Table S7** The composition of the remaining solution after metal recovery

| Composition | Li       | Ni        | Co        | Mn       | GSSG       | GSH |
|-------------|----------|-----------|-----------|----------|------------|-----|
|             | 3.48 g/L | 0.61 mg/L | 0.33 mg/L | 0.4 mg/L | 0.26 mol/L | -   |

**Table S8** The materials and energy consumption to dispose of 1 kg spent NCM cathode materials

|              | Items                           | Commodity price (\$) | Dosage | Total  |
|--------------|---------------------------------|----------------------|--------|--------|
| Leaching     | Spent NCM cathode materials     | 31.06 for 1kg        | 1kg    | 31.06  |
|              | GSH                             | 70 fo1 1kg           | 3.17kg | 221.9  |
|              | H <sub>2</sub> SO <sub>4</sub>  | 0.08 for 1kg         | 1.96kg | 0.16   |
|              | Energy cost                     | 0.07 for 1 KW·h      | 0.09   | 0.006  |
| Regeneration | Li <sub>2</sub> CO <sub>3</sub> | 53.2 for 1kg         | 1kg    | 53.2   |
|              | Energy cost                     | 0.07 for 1 KW·h      | 0.5    | 0.035  |
| Cost         |                                 |                      |        | 306.36 |

**Calculation of costs:**

At present, it is still in the stage of laboratory research, and there is no industrial data for reference. To simplify the cost calculation, only the costs of raw materials, chemical reagents and energy for the treatment of 1 kg spent NCM cathode material are considered. As all chemical reagents are provided by Chinese suppliers, the commodity price is converted from RMB (¥) to USD (\$) according to the current exchange rate (December 2022).

**(a)The cost of raw materials.** The cost of spent NCM cathode materials is calculated at \$31.06 /kg.

**(b)The cost of reagents.** According to the price and dosage of the reagents listed in Table S3, the cost of reagents for the recovery process is calculated as follow.

1- Leaching process:

$$\text{\$70/kg} * 3.17 \text{ kg} + \text{\$0.08/kg} * 1.96 = \text{\$222.05}$$

2- Regeneration process:

$$\text{\$53.2/kg} * 1 \text{ kg} = \text{\$53.2}$$

**(c)The cost of energy.** According to Table S3, the cost of energy for the recovery process is calculated as follow.

$$\text{\$0.07/ KW}\cdot\text{h} * 0.09 \text{ KW}\cdot\text{h} + \text{\$0.07/kg} * 0.5 = \text{\$0.0413}$$

**The total costs:**

$$\text{\$31.06} + \text{\$222.05} + \text{\$53.2} + \text{\$0.0413} = \text{\$306.36}$$

Calculation of benefits and profits: When recycling of 1 kg of spent NCM523 cathode materials, 0.962 kg regenerated NCM523 can be obtained and 1 kg of NCM523 cathode material is 893.75\$, the benefits and profits are calculated as follows.

**Benefits:**

$$893.75\text{\$/kg} * 0.962 \text{ kg} = 859.79 \text{ \$}$$

**Profits:**

$$\text{\$859.79} - \text{\$306.36} = 553.43\text{\$}$$

**Table S9** The comparison of different methods for recycling of spent cathode material

| Methods           | Chemicals consumption                                                                                                                                   | Energy Consumption | Leaching efficiencies                      | Ref.      |
|-------------------|---------------------------------------------------------------------------------------------------------------------------------------------------------|--------------------|--------------------------------------------|-----------|
| Inorganic acid    | 2mol/L H <sub>2</sub> SO <sub>4</sub> , 1-time theoretical dosage of GSH, 10:1 of LS                                                                    | 200rpm, 65°C, 1h   | Over 99% of Li, Ni, Co and Mn              | This work |
|                   | 4mol/L H <sub>2</sub> SO <sub>4</sub> , 2 times theoretical dosage of H <sub>2</sub> O <sub>2</sub> , 8:1 of LS                                         | 500rpm, 90°C, 2h   | 98% Ni, 99% Co and 84% Mn                  | [1]       |
|                   | 1mol/L H <sub>2</sub> SO <sub>4</sub> , 0.075mol/L NaHSO <sub>3</sub> , 20:1 of LS                                                                      | 95°C, 4h           | 96.7% Li, 96.4% Ni, 91.6% Co, 87.9% Mn     | [2]       |
|                   | 3 mol/L H <sub>2</sub> SO <sub>4</sub> , 5% ethanol, 20:1 of LS                                                                                         | 90°C, 3h           | Over 99% of Li and Co                      | [3]       |
| Organic acid      | 3.5 mol/L acetic acid, 40 g/L, 4% H <sub>2</sub> O <sub>2</sub> (volume fraction)                                                                       | 60°C, 90min        | 99.97 %Li, 92.67 %Ni, 93.62 %Co, 96.32 %Mn | [4]       |
|                   | 1.0 mol/L citric acid, 8% H <sub>2</sub> O <sub>2</sub> , S/L of 40:1,                                                                                  | 70 min ,70 °C      | Over 99% of Li and Co                      | [5]       |
|                   | 0.075 mol/L benzenesulfonic acid, 3% H <sub>2</sub> O <sub>2</sub> , S/L of 15:1,                                                                       | 80 min ,90 °C      | 99.58% Li, 96.53%Co                        | [6]       |
| Alkaline leaching | 1.5 mol/L NH <sub>3</sub> H <sub>2</sub> O, 1 mol/L (NH <sub>4</sub> ) <sub>2</sub> SO <sub>3</sub> and NH <sub>4</sub> HCO <sub>3</sub> , S/L of 20:1, | 180 min, 60 °C     | 60.53% Li, 100%Ni, 80.99% Co, 100%Cu       | [7]       |
|                   | 6 mol/L NH <sub>3</sub> H <sub>2</sub> O, 0.5 mol/L NH <sub>4</sub> Cl, 0.5 mol/L, (NH <sub>4</sub> ) <sub>2</sub> SO <sub>3</sub> , S/L of 10:1,       | 30min, 150 °C      | 90.3% Li, 100% Co, 98.3% Ni                | [8]       |

## References

- [1] Y. Yang, G. Huang, S. Xu, Y. He, X. Liu, Thermal treatment process for the recovery of valuable metals from spent lithium-ion batteries, *Hydrometallurgy*, 165 (2016) 390-396.
- [2] P. Meshram, B.D. Pandey, T.R. Mankhand, Hydrometallurgical processing of spent lithium ion batteries (LIBs) in the presence of a reducing agent with emphasis on kinetics of leaching, *Chemical Engineering Journal*, 281 (2015) 418-427.
- [3] J. Zhao, B. Zhang, H. Xie, J. Qu, X. Qu, P. Xing, H. Yin, Hydrometallurgical recovery of spent cobalt-based lithium-ion battery cathodes using ethanol as the reducing agent, *Environ Res*, 181 (2020) 108803.
- [4] W. Gao, J. Song, H. Cao, X. Lin, X. Zhang, X. Zheng, Y. Zhang, Z. Sun, Selective recovery of valuable metals from spent lithium-ion batteries – Process development and kinetics evaluation, *Journal of Cleaner Production*, 178 (2018)

833-845.

- [5] M. Yu, Z. Zhang, F. Xue, B. Yang, G. Guo, J. Qiu, A more simple and efficient process for recovery of cobalt and lithium from spent lithium-ion batteries with citric acid, *Separation and Purification Technology*, 215 (2019) 398-402.
- [6] Y. Fu, Y. He, L. Qu, Y. Feng, J. Li, J. Liu, G. Zhang, W. Xie, Enhancement in leaching process of lithium and cobalt from spent lithium-ion batteries using benzenesulfonic acid system, *Waste Manag*, 88 (2019) 191-199.
- [7] C. Wu, B. Li, C. Yuan, S. Ni, L. Li, Recycling valuable metals from spent lithium-ion batteries by ammonium sulfite-reduction ammonia leaching, *Waste Manag*, 93 (2019) 153-161.
- [8] S. Wang, C. Wang, F. Lai, F. Yan, Z. Zhang, Reduction-ammoniacal leaching to recycle lithium, cobalt, and nickel from spent lithium-ion batteries with a hydrothermal method: Effect of reductants and ammonium salts, *Waste Manag*, 102 (2020) 122-130.
